# Supplementary material for: Revealing the mechanism of VOx/Ti3AlC2 for the dehydrogenation of propane
Source: Royal Society of Chemistry journal article supplement (doi:10.1039/d4nj02241f), 2024-01-01
Supplement: d4nj02241f1.pdf [file d4nj02241f1.pdf]

## Revealing the mechanism of $\text{VO}_x/\text{Ti}_3\text{AlC}_2$ for the dehydrogenation of propane

Shenghui Tao,<sup>ab</sup> Xu Luo<sup>a</sup> and Shan Xu<sup>\*a</sup>

<sup>a</sup> State Key Laboratory for Oxo Synthesis and Selective Oxidation, Lanzhou Institute of Chemical Physics, Chinese Academy of Sciences, Lanzhou 730000, P. R. China.

<sup>b</sup> University of Chinese Academy of Sciences, Beijing 100049, P. R. China.

\* Correspondence author. E-mail: xushan@licp.cas.cn

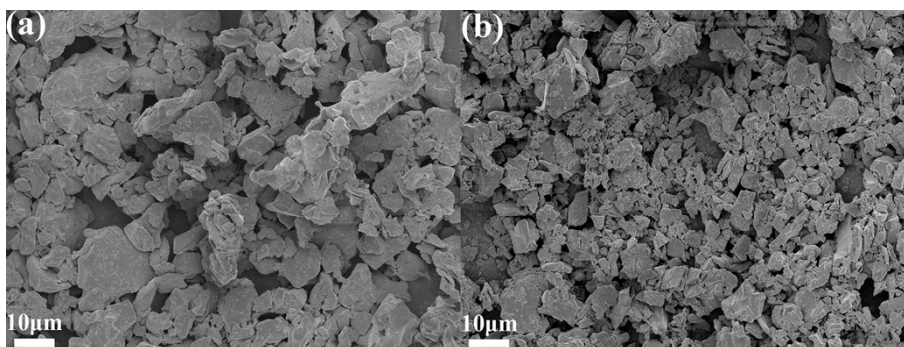

Fig. S1 SEM images for  $\text{Ti}_3\text{AlC}_2$  (a) and  $1.2\text{V}/\text{Ti}_3\text{AlC}_2$  (b).

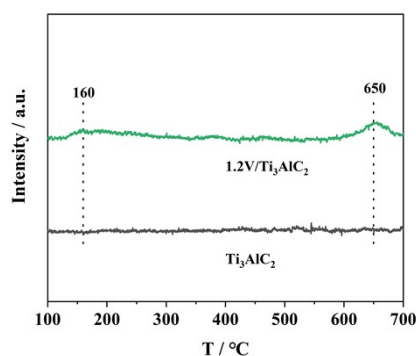

Fig. S2  $\text{NH}_3$ -TPD profiles of  $\text{Ti}_3\text{AlC}_2$  and supported  $\text{VO}_x/\text{Ti}_3\text{AlC}_2$  catalysts.

Table S1. Analysis of V 2p of xV/Ti<sub>3</sub>AlC<sub>2</sub> catalysts

| Samples                               | Peak area fractions (%)    |                            |
|---------------------------------------|----------------------------|----------------------------|
|                                       | V <sup>4+</sup> (516.6 eV) | V <sup>5+</sup> (517.6 eV) |
| 0.2V/Ti <sub>3</sub> AlC <sub>2</sub> | 59.0                       | 41.0                       |
| 1.2V/Ti <sub>3</sub> AlC <sub>2</sub> | 34.3                       | 65.7                       |
| 2.4V/Ti <sub>3</sub> AlC <sub>2</sub> | 25.1                       | 74.9                       |
| 4.1V/Ti <sub>3</sub> AlC <sub>2</sub> | 11.2                       | 88.8                       |

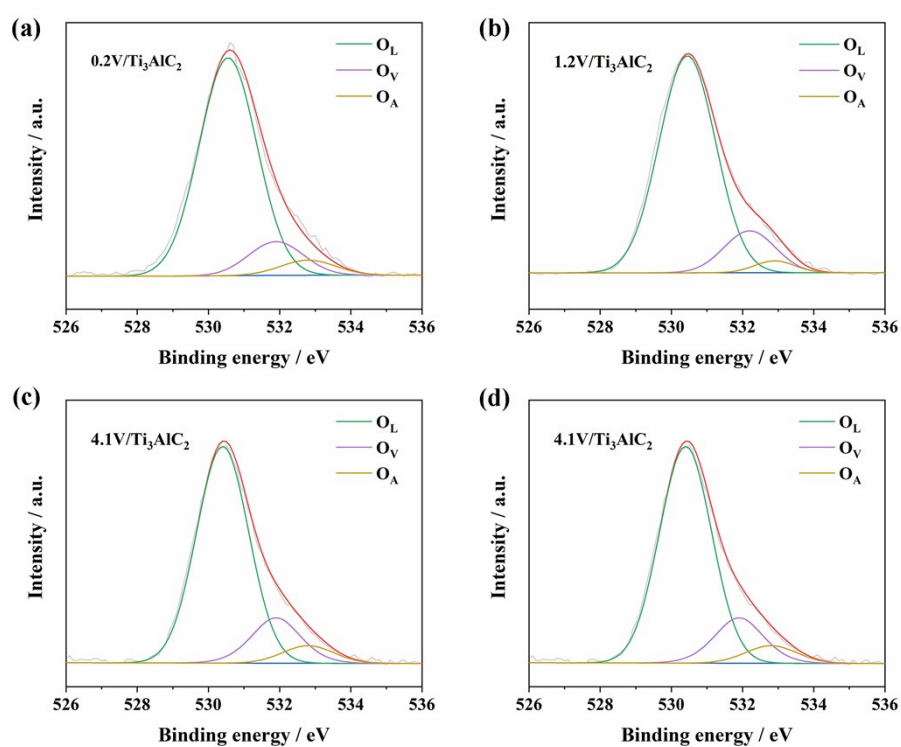

Fig. S3 O 1s XPS spectra of 0.2-4.1V/Ti<sub>3</sub>AlC<sub>2</sub>.

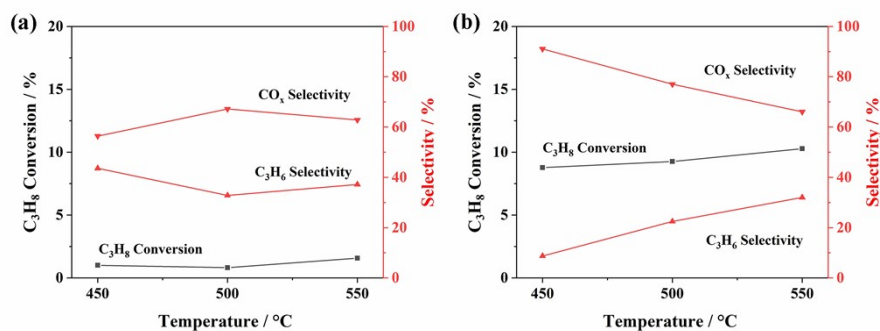

**Fig. S4** The ODHP performance of  $\text{Ti}_3\text{AlC}_2$  (a) and  $\text{Ti}_3\text{AlC}_2$  calcined at 550 °C in air (b). Reaction conditions:  $m_{\text{cat}} = 1.0\text{g}$ ,  $T=450\text{-}550\text{ }^\circ\text{C}$ ,  $\text{C}_3\text{H}_8/\text{Air}=1:1.2$ , inlet flow =  $8.8\text{ ml min}^{-1}$ .

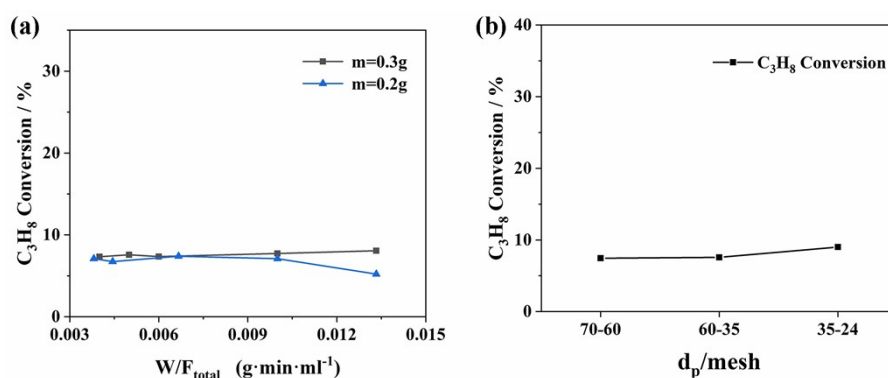

**Fig. S5** The influence of contact time (a) and catalyst particle size (b) on the  $\text{C}_3\text{H}_8$  conversion at 500 °C.

0.2 and 0.3 g  $1.2\text{V}/\text{Ti}_3\text{AlC}_2$  catalyst diluted with quartz sand were placed in a fixed bed to investigate to external diffusion influence.  $\text{C}_3\text{H}_8$  conversion is almost same on the catalysts with different mass in the range of total space velocity of  $6000\text{-}15750\text{ ml h}^{-1}\text{ g}_{\text{cat}}^{-1}$  (Figure S4(a)), suggesting that there is no effect of external diffusion. In addition, at a total space velocity of  $12000\text{ ml h}^{-1}\text{ g}_{\text{cat}}^{-1}$ ,  $\text{C}_3\text{H}_8$  conversion is similar in the range of catalyst particle size of 35-60 mesh (Figure S4(b)), which is the characteristic of internal diffusion exclusion.

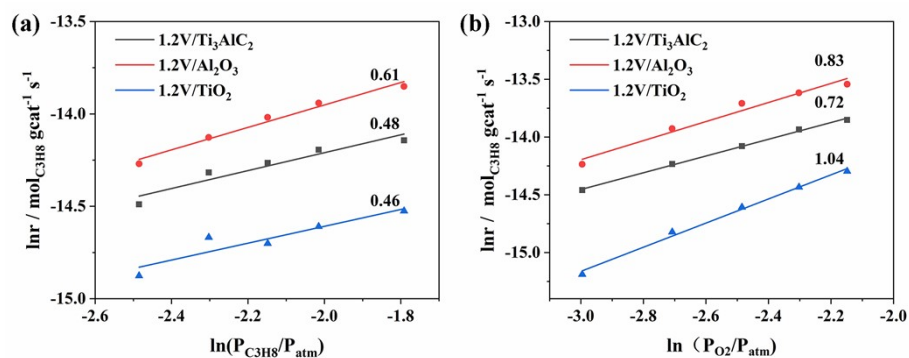

**Fig. S6** Dependence of  $(x_{\text{C}_3\text{H}_8} x_{\text{O}_2} / r)^{1/2}$  on  $x_{\text{C}_3\text{H}_8}$  (a) and  $x_{\text{O}_2}$  (b) in the range of  $x_{\text{C}_3\text{H}_8} = 0.083\text{-}0.167$  and  $x_{\text{O}_2} = 0.067\text{-}0.133$ .

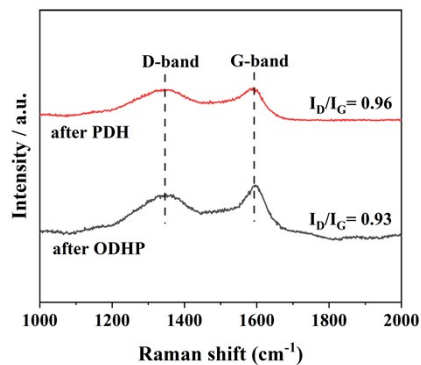

**Fig. S7** Raman spectra for the spent 1.2V/Ti<sub>3</sub>AlC<sub>2</sub> catalysts after 2h reaction. Reaction conditions: ODHP reaction,  $m_{\text{cat}} = 1.0$  g, C<sub>3</sub>H<sub>8</sub>/Air=1: 1.2 (C<sub>3</sub>H<sub>8</sub>: O<sub>2</sub> = 1: 0.25), inlet flow = 8.8 ml min<sup>-1</sup>; PDH reaction,  $m_{\text{cat}} = 1.0$  g, C<sub>3</sub>H<sub>8</sub>/N<sub>2</sub>=1: 1.2, inlet flow = 8.8 ml min<sup>-1</sup>.

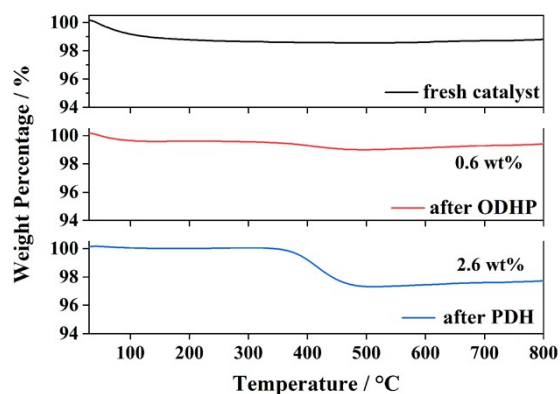

**Fig. S8** TGA curves for the fresh 1.2V/Ti<sub>3</sub>AlC<sub>2</sub> catalyst and the spent 1.2V/Ti<sub>3</sub>AlC<sub>2</sub> catalysts after 2h reaction. Reaction conditions: ODHP reaction,  $m_{\text{cat}} = 1.0$  g, C<sub>3</sub>H<sub>8</sub>/Air=1: 1.2 (C<sub>3</sub>H<sub>8</sub>: O<sub>2</sub> = 1: 0.25), inlet flow = 8.8 ml min<sup>-1</sup>; PDH reaction,  $m_{\text{cat}} = 1.0$  g, C<sub>3</sub>H<sub>8</sub>/N<sub>2</sub>=1: 1.2, inlet flow = 8.8 ml min<sup>-1</sup>.

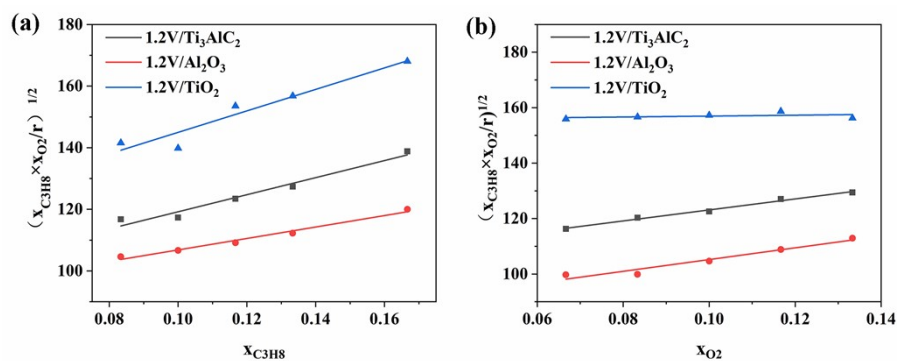

**Fig. S9** Dependence of reaction rates on the partial pressure of (a) propane (8.3-16.7 kPa) and (b) oxygen (5-11.7 kPa) over different catalysts in ODHP reaction. The reactions were carried out at 500 °C and the total space velocity is 12000 mL h<sup>-1</sup> g<sub>cat</sub><sup>-1</sup>.

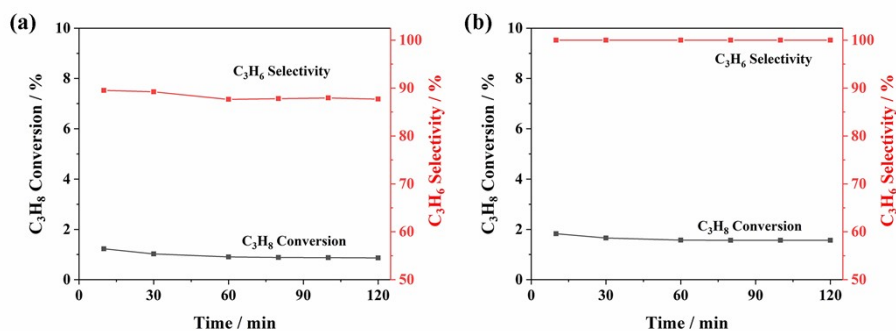

**Fig. S10** The PDH performance of  $\text{Ti}_3\text{AlC}_2$  (a) and  $\text{Ti}_3\text{AlC}_2$  calcined at 550 °C in air (b). Reaction conditions:  $m_{\text{cat}} = 1.0\text{g}$ ,  $T=550\text{ }^\circ\text{C}$ ,  $\text{C}_3\text{H}_8/\text{N}_2=1: 4$ , inlet flow = 20 ml  $\text{min}^{-1}$ .

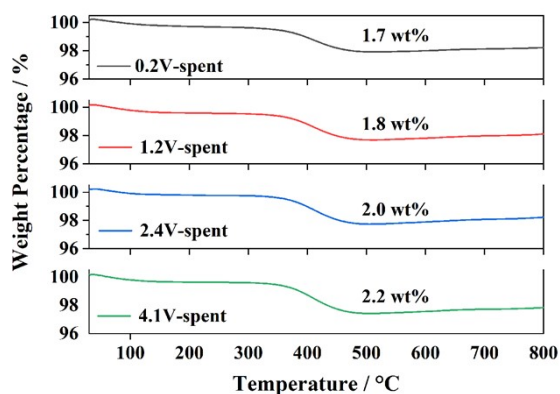

**Fig. S11** TGA curves for the spent catalysts after 2h reaction. Reaction conditions:  $m_{\text{cat}} = 1.0\text{ g}$ ,  $T=550\text{ }^\circ\text{C}$ ,  $\text{C}_3\text{H}_8/\text{N}_2=1: 4$ , inlet flow = 20 ml  $\text{min}^{-1}$ .

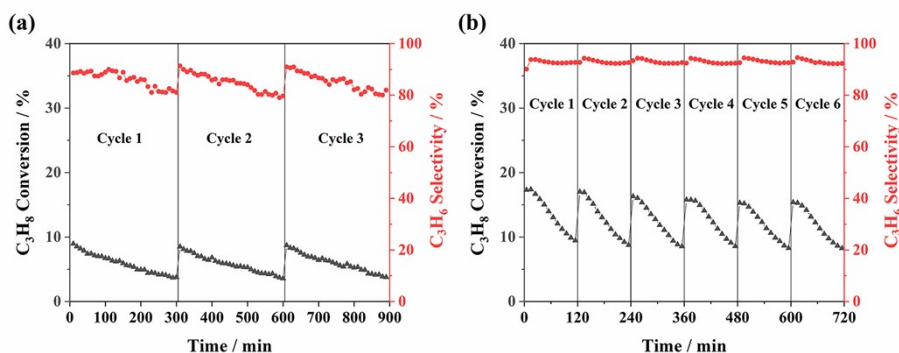

**Fig. S12** The catalytic performance of 1.2V/ $\text{Ti}_3\text{AlC}_2$  catalyst in ODHP (a) and PDH (b) reactions as a function of time. Reaction conditions: ODHP reaction,  $T=550\text{ }^\circ\text{C}$ ,  $m_{\text{cat}} = 1.0\text{ g}$ ,  $\text{C}_3\text{H}_8/\text{Air}=1: 1.2$  ( $\text{C}_3\text{H}_8: \text{O}_2 = 1: 0.25$ ), inlet flow = 8.8 ml  $\text{min}^{-1}$ ; PDH reaction,  $T=550\text{ }^\circ\text{C}$ ,  $m_{\text{cat}} = 1.0\text{ g}$ ,  $\text{C}_3\text{H}_8/\text{N}_2=1: 4$ , inlet flow = 20 ml  $\text{min}^{-1}$ .

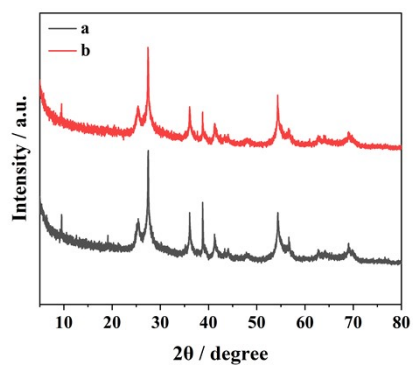

Fig. S13 XRD patterns of the 1.2V/Ti<sub>3</sub>AlC<sub>2</sub> catalysts after ODHP (a) and PDH (b) regenerative cycles.

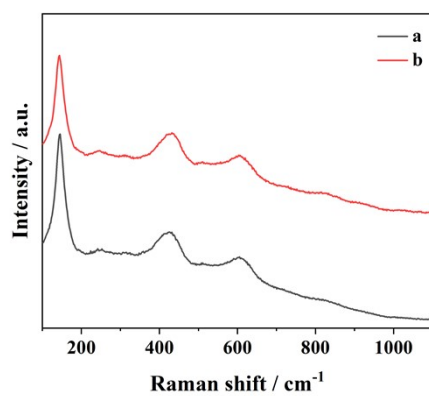

Fig. S14 Raman spectra of the 1.2V/Ti<sub>3</sub>AlC<sub>2</sub> catalysts after ODHP (a) and PDH (b) regenerative cycles.

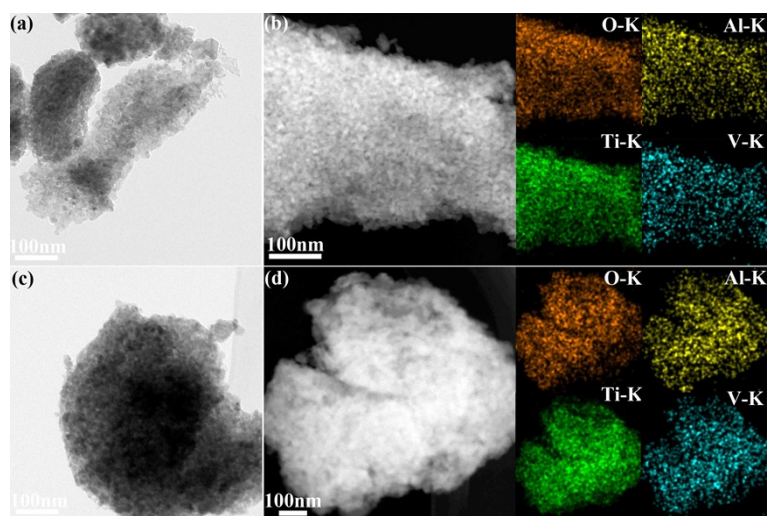

Fig. S15 TEM images and EDS mapping for 1.2V/Ti<sub>3</sub>AlC<sub>2</sub> catalysts after ODHP (a, b) and PDH (c, d) regenerative cycles.
